# Supplementary material for: Structure-based network analysis predicts pathogenic variants in human proteins associated with inherited retinal disease
Source: PubMed Central journal article supplement (PMC11130145; doi:10.1038/s41525-024-00416-w), 2024-05-27
Supplement: 41525_2024_416_MOESM1_ESM.pdf [file 41525_2024_416_MOESM1_ESM.pdf]

**Supplementary Materials for:**

**Title:** Structure-based network analysis predicts pathogenic variants in human proteins associated with inherited retinal disease

**Authors:** Blake M. Hauser, PhD<sup>1</sup>; Yuyang Luo, PhD<sup>2</sup>; Anusha Nathan, BS<sup>3</sup>; Ahmad Al-Moujahed, MD, PhD, MPH<sup>2</sup>; Demetrios Vavvas, MD, PhD<sup>2</sup>; Jason Comander MD, PhD<sup>2</sup>; Eric A. Pierce, MD, PhD<sup>2</sup>; Emily M. Place, MS<sup>2</sup>; Kinga M. Bujakowska, PhD<sup>2</sup>; Gaurav D. Gaiha, MD, DPhil<sup>3,4</sup>, Elizabeth J. Rossin, MD, PhD<sup>2</sup>

<sup>1</sup> Harvard Medical School, Boston, MA

<sup>2</sup> Department of Ophthalmology, Massachusetts Eye and Ear, Harvard Medical School, Boston, MA

<sup>3</sup> Ragon Institute of Mass General, MIT, and Harvard, Cambridge, MA

<sup>4</sup> Division of Gastroenterology, Massachusetts General Hospital, Boston, MA

**Corresponding author:**

Elizabeth J. Rossin, MD, PhD

Department of Ophthalmology

Massachusetts Eye and Ear

243 Charles St, Boston, MA 02114, USA

E-mail address: elizabeth\_rossin@meei.harvard.edu

**a.**

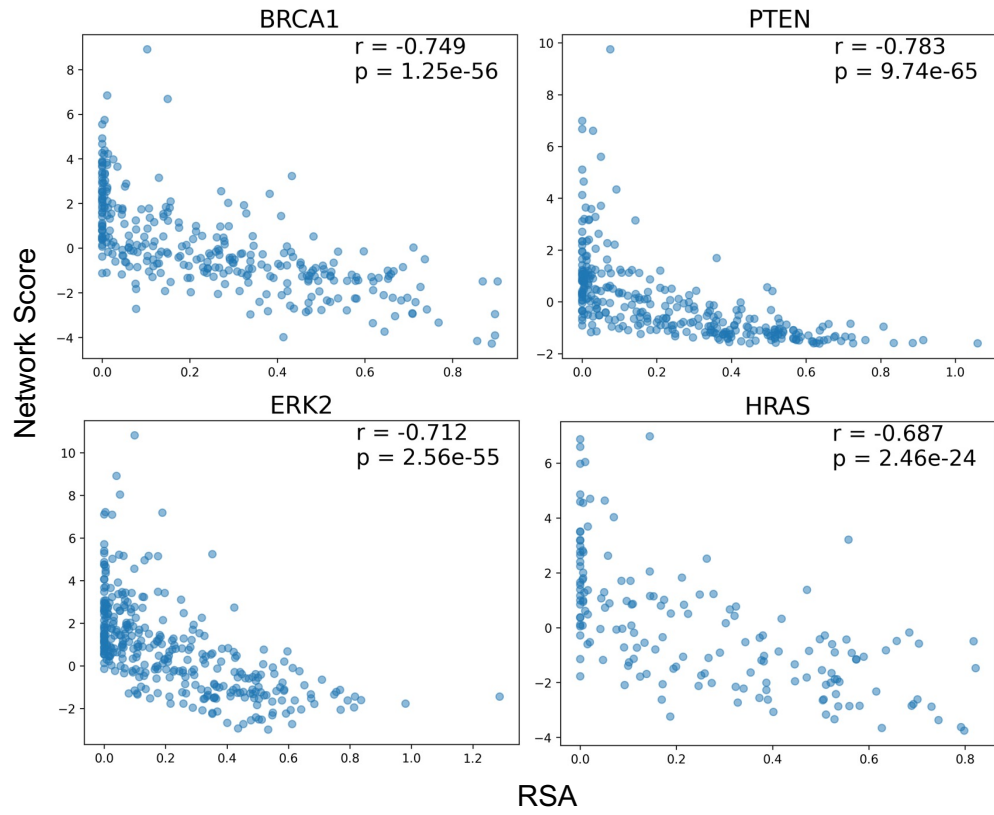

**b.**

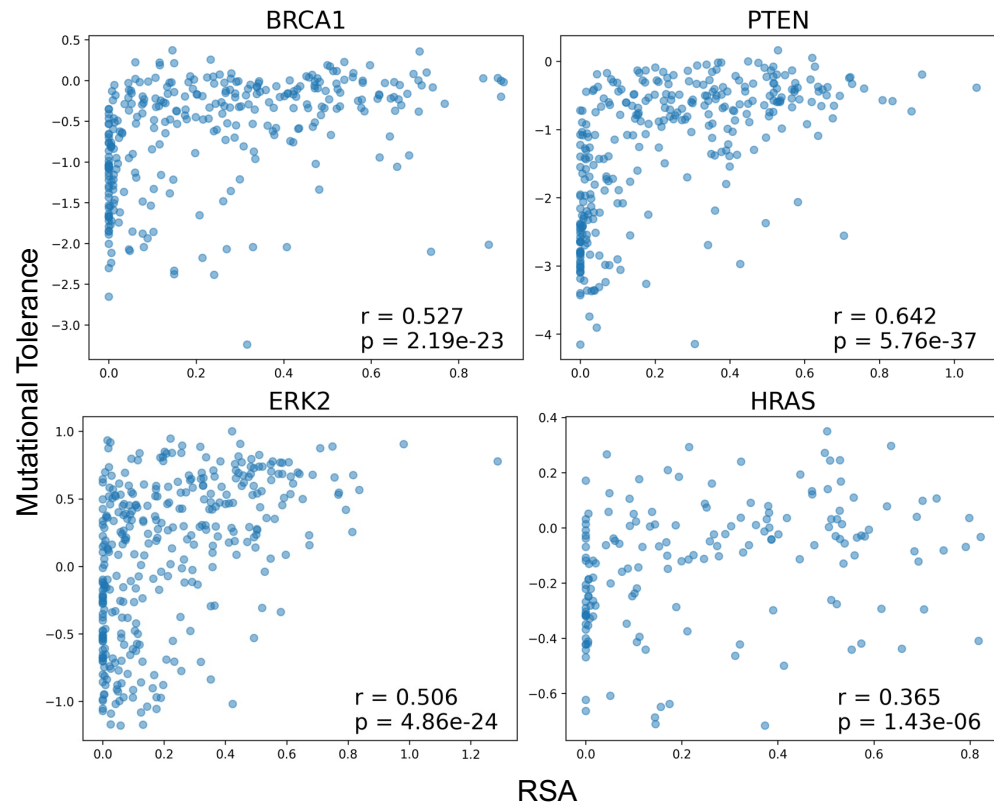

**Supplementary Figure 1. Network scores and mutational tolerance correlate with relative solvent accessibility. (A) Network scores and (B) *in vitro* saturation mutagenesis functional scores (corresponding to mutational tolerance) correlate with RSA. Spearman correlation coefficients and p-values are displayed for each plot.**

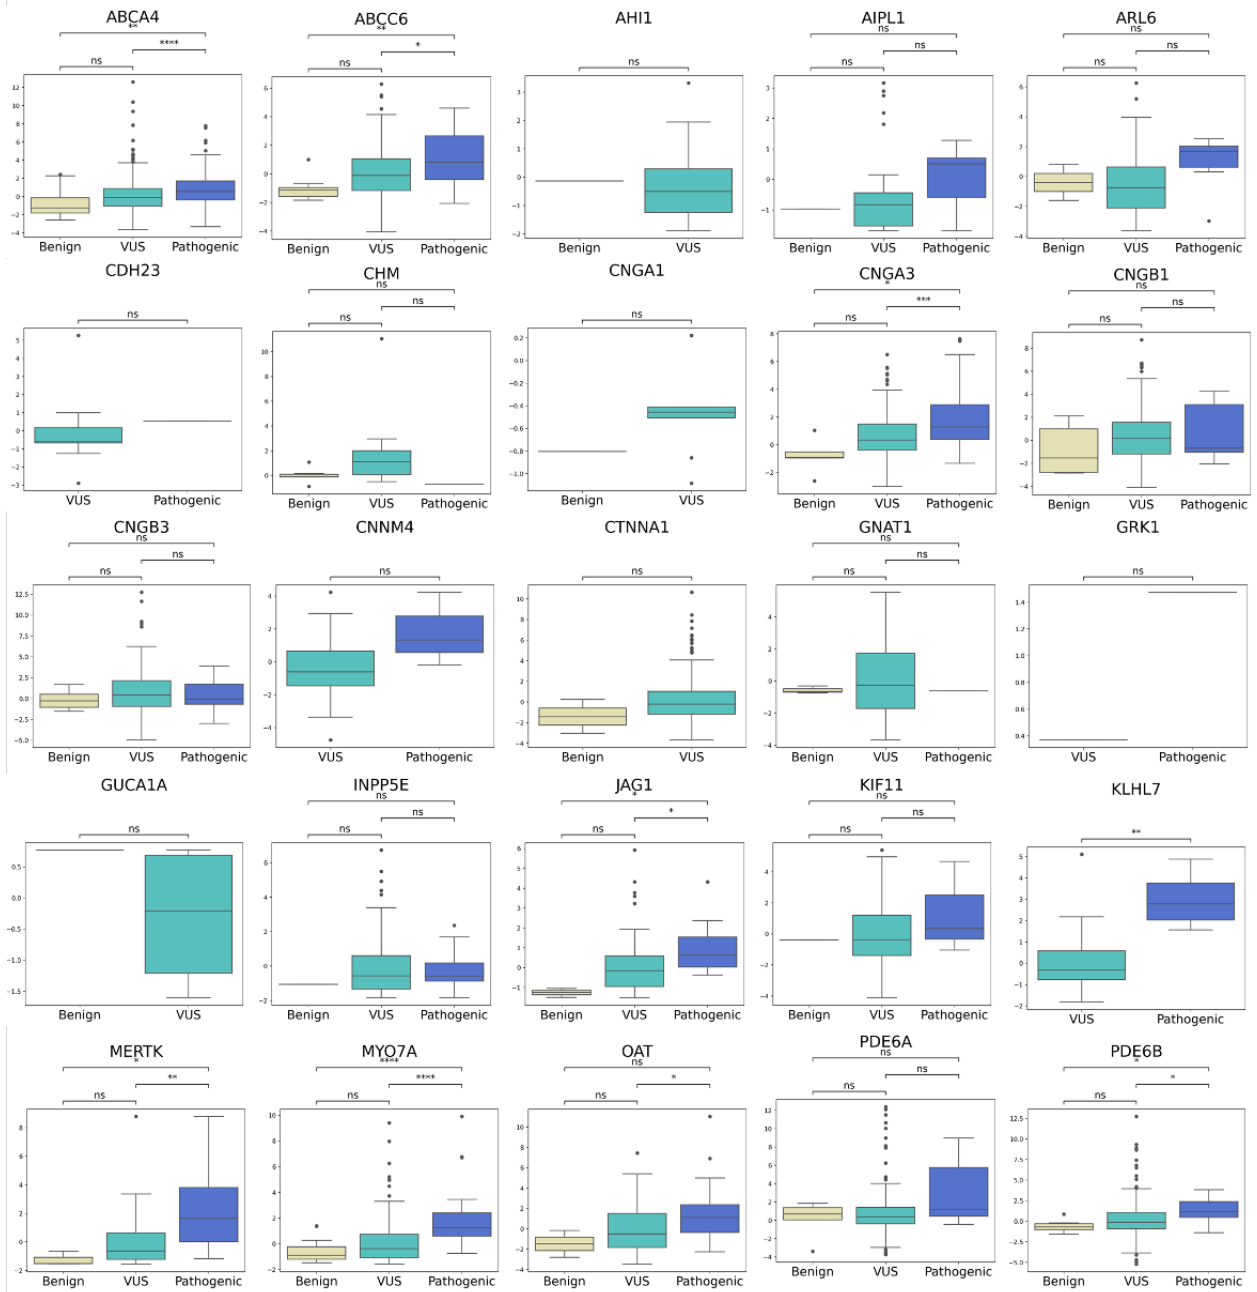

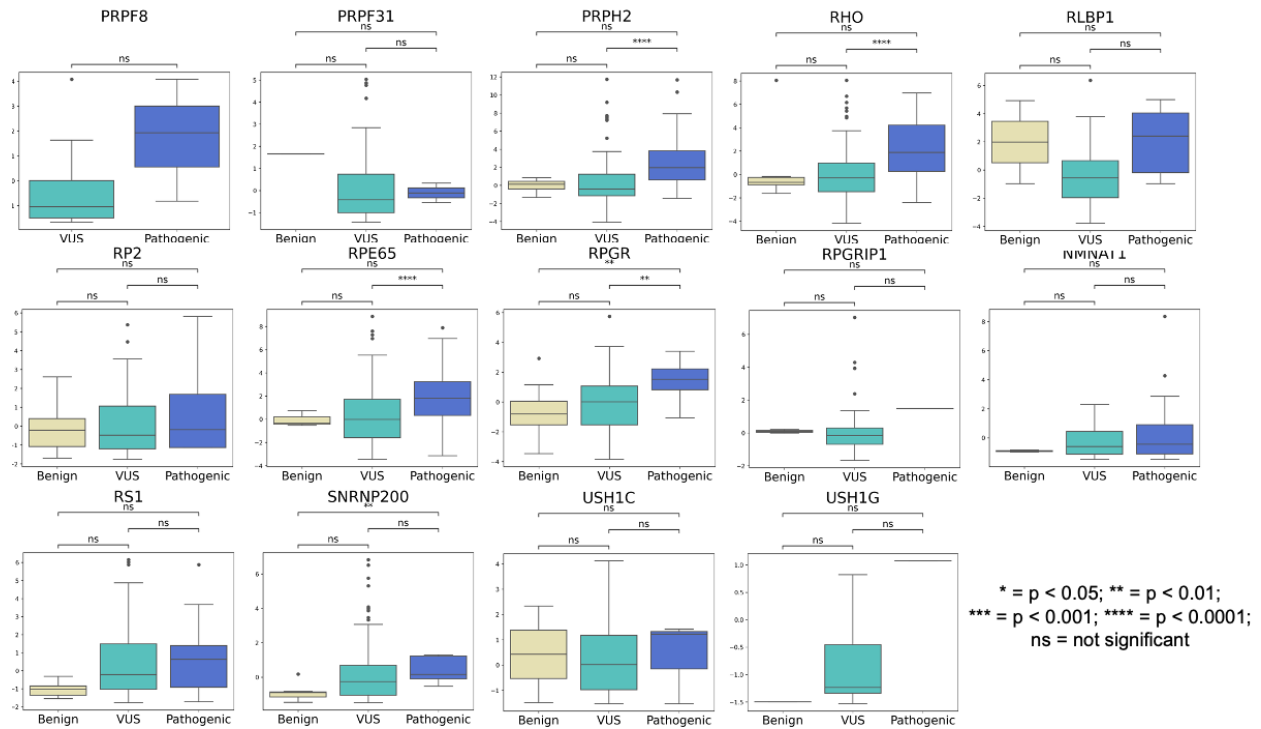

**Supplementary Figure 2. Structure-based network analysis highlights pathogenic variants in individual inherited retinal disease proteins.** Select individual comparisons between network scores for variants with available clinical phenotype data for inherited retinal disease proteins.

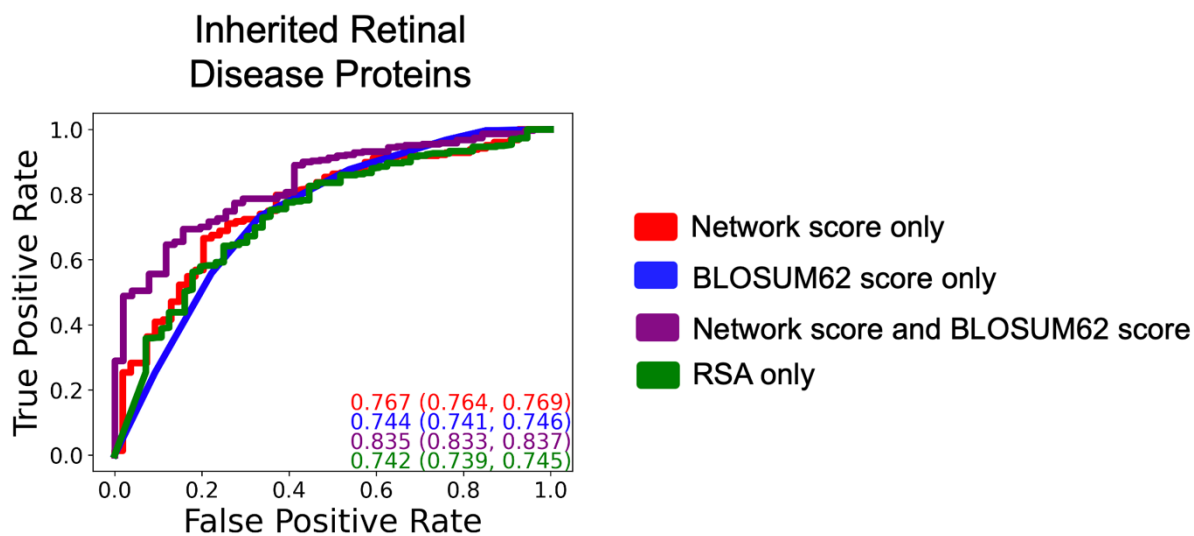

**Supplementary Figure 3. Logistic regression-based modelling using SBNA is superior to modelling using RSA alone.** Application of univariate and multivariable logistic regression to the inherited retinal disease protein datasets. All regressions were performed using a 70%/30% train/test data split with 500 iterations, and a representative ROC curve with AUC closest to the mean is shown for each regression model. AUC values are displayed as the mean followed by a 95% confidence interval.

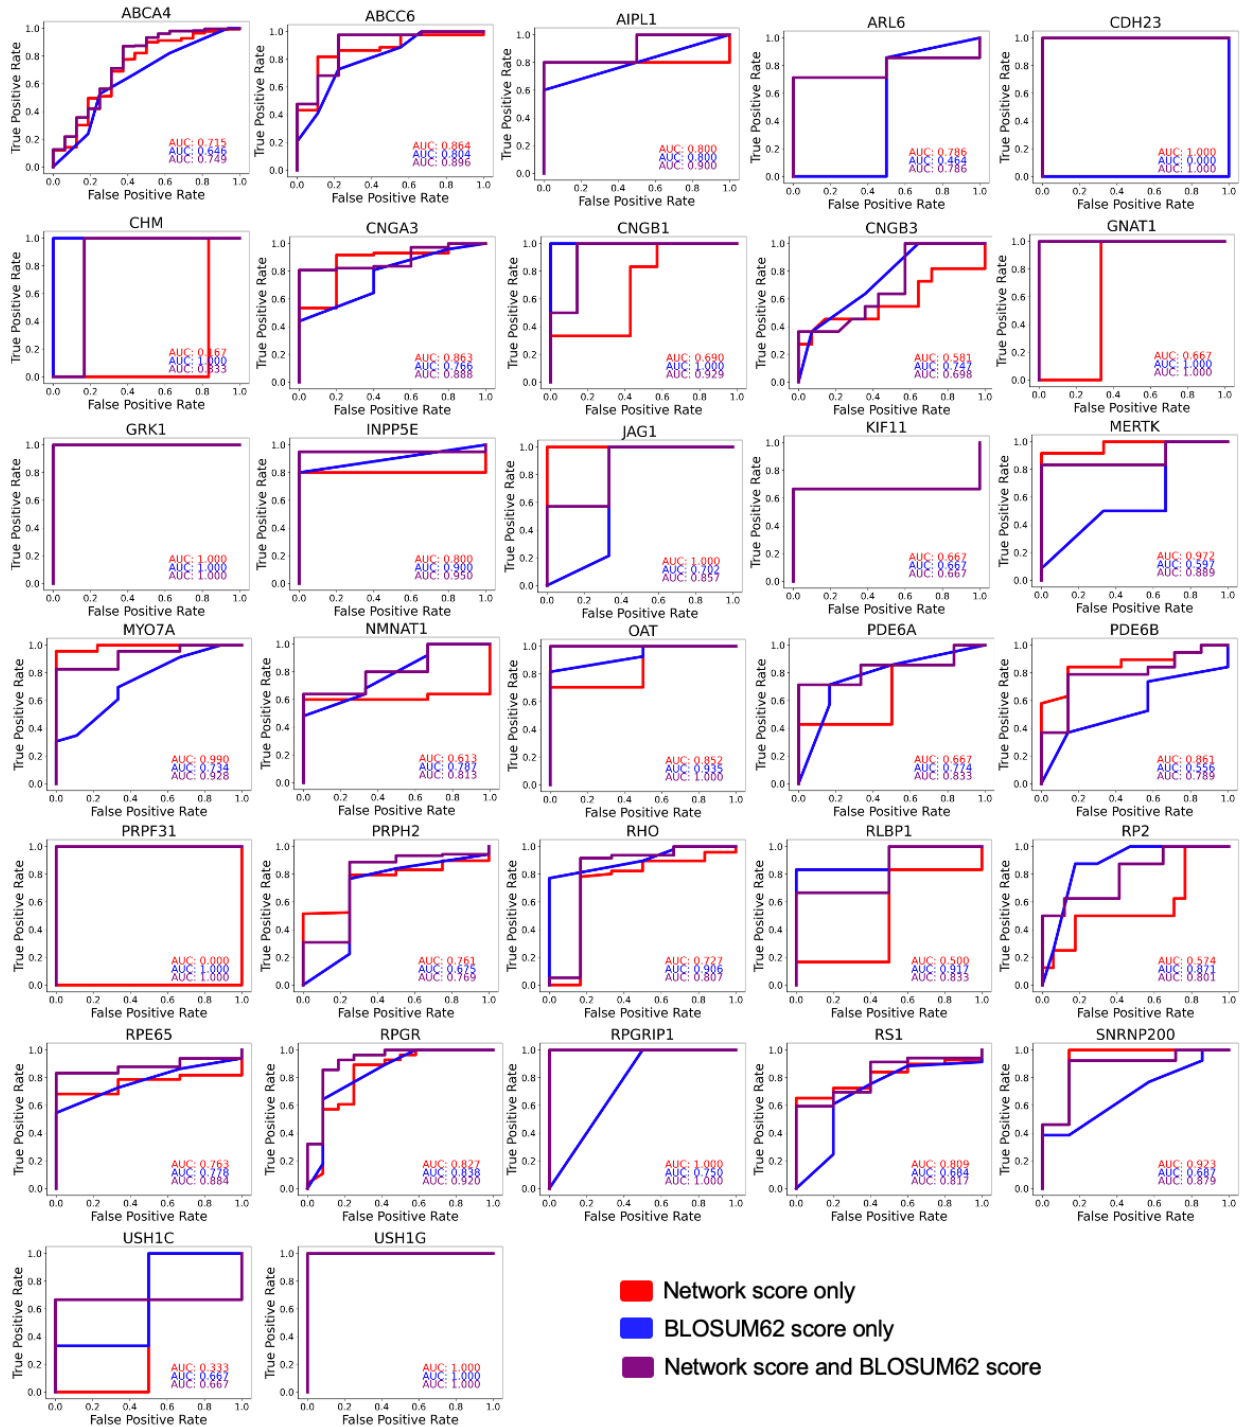

**Supplementary Figure 4. Logistic regression-based modelling using SBNA and BLOSUM62 is superior to univariate models for some individual proteins. Application of univariate and multivariable logistic regression models to the 32 inherited retinal disease**

proteins for which there was sufficient data to facilitate individual analysis. All regressions were trained on all proteins except the protein of interest and then tested on that protein. ROC curves and AUC values are shown.



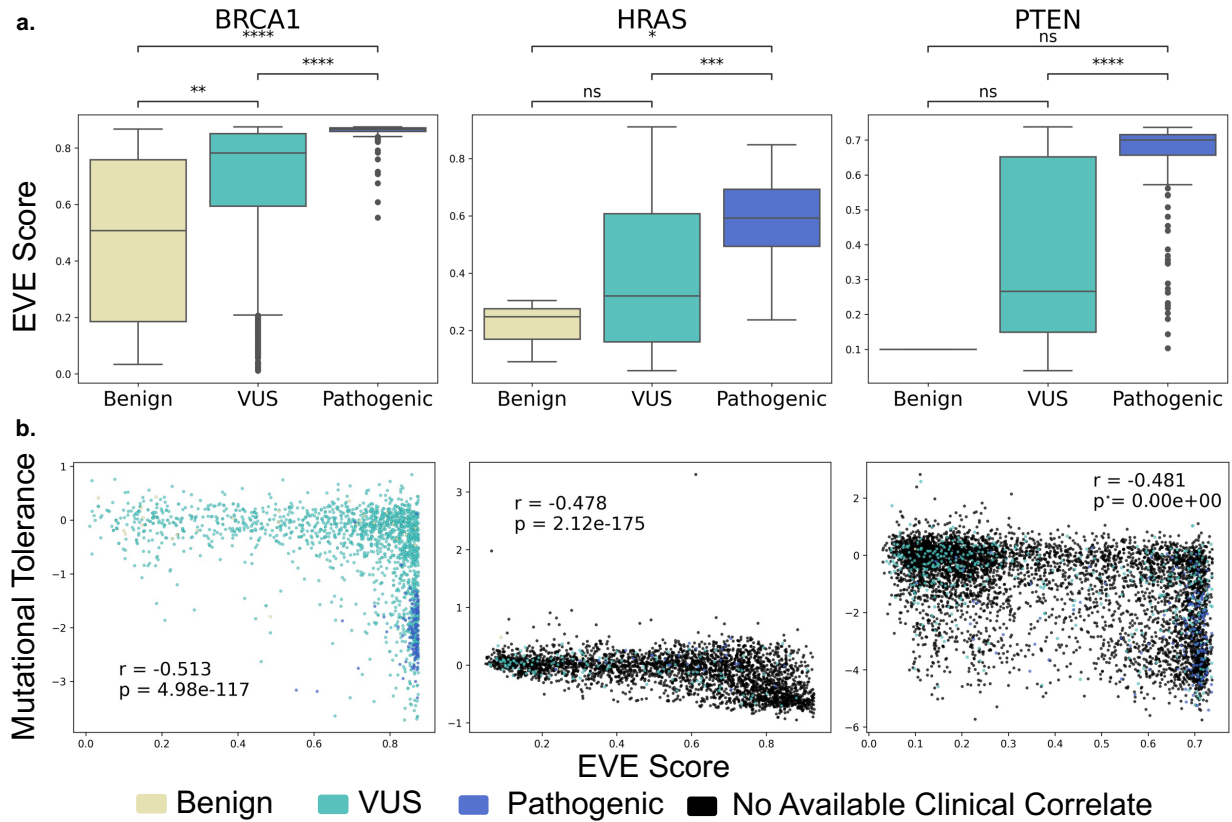

**Supplementary Figure 5. EVE score correlates with mutational intolerance. (A)** Pooled comparison between EVE scores for variants with available clinical phenotype data. **(B)** Comparison between functional data from saturation mutagenesis experiments and EVE scores, with Spearman correlation coefficients and p-values displayed for each plot. Points are colored based on available clinical phenotype data. EVE score data was not available for *ERK2*, so it was excluded from this analysis.

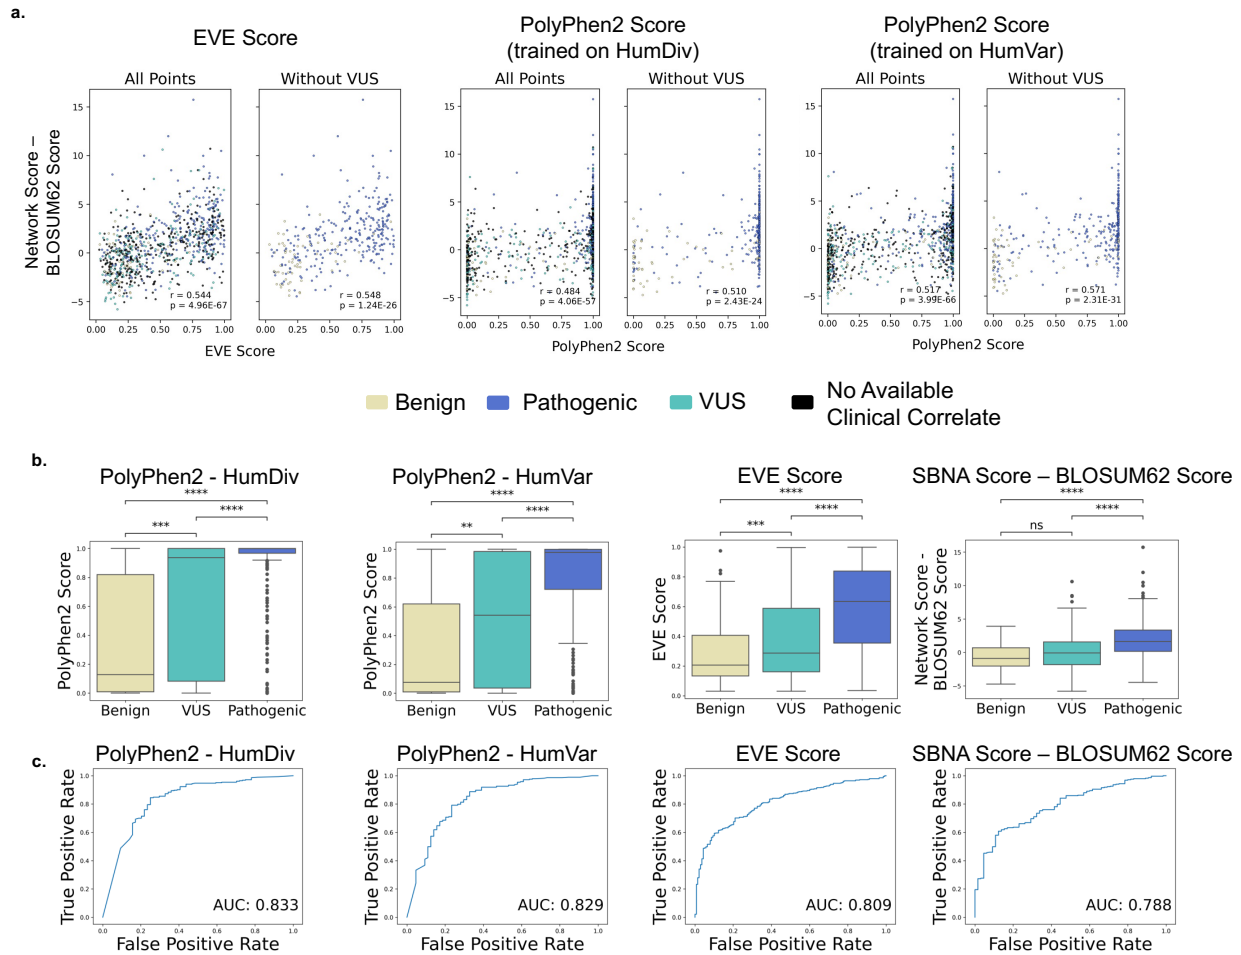

**Supplementary Figure 6. Metrics incorporating SBNA scores show similar trends to estimates from PolyPhen2 and EVE within the dataset of all rare variants from patients with IRD at MEE.** PolyPhen2<sup>1</sup>, EVE<sup>2</sup>, and SBNA scores were generated for the full set of all rare variants across patients with IRD at MEE. For each model, the subset of variants for which scores could be calculated were considered for downstream analysis. **(A)** Comparison between pathogenicity probability estimates generated by PolyPhen2 trained on either the HumDiv or HumVar training data, EVE, and BLOSUM62 scores subtracted from raw SBNA scores with Spearman correlation coefficients displayed for each plot. **(B)** Comparison between pathogenicity probability estimates grouped by benign, VUS, and pathogenic variants as determined by ClinVar and gnomAD. (ns = not significant; \* =  $p < 0.05$ ; \*\* =  $p < 0.01$ ; \*\*\* =

$p < 0.001$ ; \*\*\*\* =  $p < 0.0001$ ) (C) ROC curves and AUC values for application of each model.

Benign and pathogenic variants were determined based on ClinVar and gnomAD.

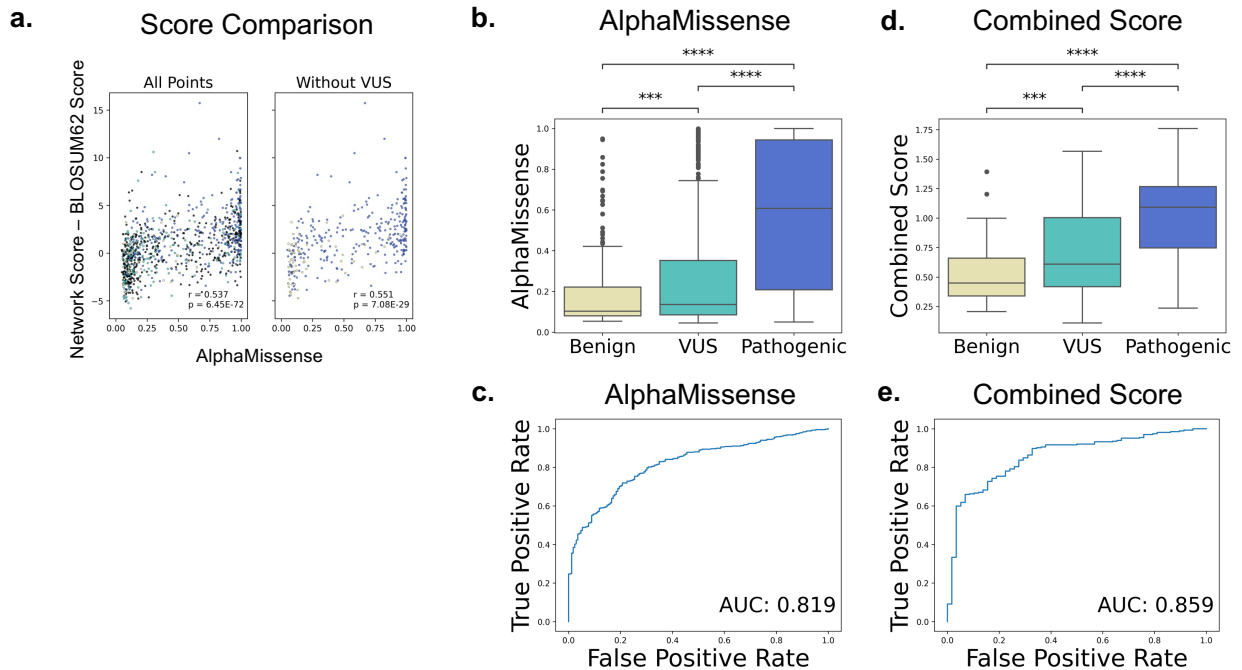

**Supplementary Figure 7. Pathogenicity estimates incorporating orthogonal metrics show superior performance.** AlphaMissense<sup>3</sup> scores and scores combining the difference between SBNA scores and BLOSUM62 scores as well as EVE<sup>2</sup> scores were generated for the full set of all rare variants across patients with IRD at MEE. The subset of variants for which each score could be calculated were considered for downstream analysis. **(A)** Comparison between pathogenicity estimates generated by AlphaMissense and BLOSUM62 scores subtracted from raw SBNA scores with Spearman correlation coefficients displayed for each plot. **(B, D)** Comparison between model estimates grouped by benign, VUS, and pathogenic variants as determined by ClinVar and gnomAD. (ns = not significant; \* =  $p < 0.05$ ; \*\* =  $p < 0.01$ ; \*\*\* =  $p < 0.001$ ; \*\*\*\* =  $p < 0.0001$ ) **(C, E)** ROC curves and AUC values for application of models. Benign and pathogenic variants were determined based on ClinVar and gnomAD.

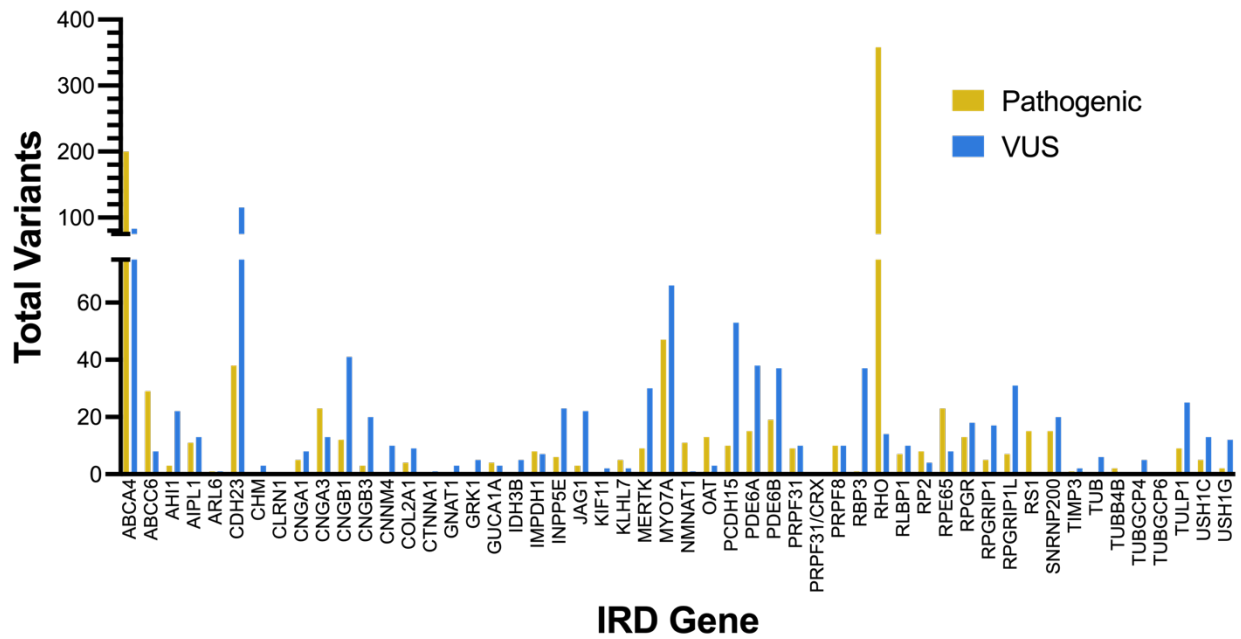

**Supplementary Figure 8. Pathogenic variants and VUS from MEE patients span 52 IRD genes.** Distribution of total pathogenic variants and VUS (as categorized by ClinVar) from MEE patients across the 52 IRD genes considered in this analysis.

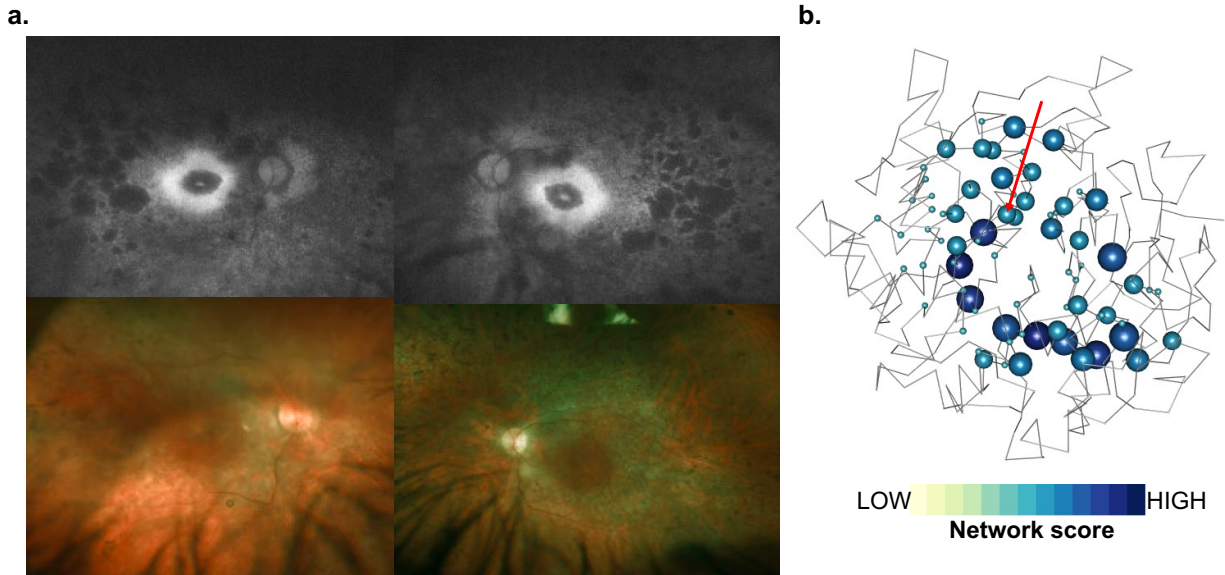

**Supplementary Figure 9. SBNA helps identify pathogenic variants in a patient with RPGR-related inherited retinal disease.** Representation of network scores for a sample structure with putative solving genetic variants. Sphere radius corresponds to network score magnitude at a particular position. A patient with clinical evidence of RPGR-related disease (**A**) but with no complete genetic explanation was fully solved using SBNA which highlighted a hemizygous variant (Cys302Tyr) that score highly in the RPGR protein structure (**B**).

| <b>Protein</b> | <b>PDB</b> |
|----------------|------------|
| AHI1           | 4ESR       |
| ARL6           | 2H57       |
| CNGA1          | 7LFT       |
| CNNM4          | 6G52       |
| CNNM4          | 6RS2       |
| COL2A1         | 5NIR       |
| GRK1           | 3C4Z       |
| GUCA1A         | 2R2I       |
| IMPDH1         | 7RER       |
| INPP5E         | 2XSW       |
| JAG1           | 4CC0       |
| KIF11          | 1Q0B       |
| KLHL7          | 3II7       |
| MERTK          | 7AB0       |
| NMNAT1         | 1KKU       |
| OAT            | 1OAT       |
| OFD1           | 6E0T       |
| PRPF8          | 3ENB       |
| RLBP1          | 3HY5       |
| RP2            | 2BX6       |
| RS1            | 3JD6       |
| SNRNP200       | 4KIT       |
| TUB            | 1S31       |
| TULP1          | 3C5N       |
| PTEN           | 1D5R       |
| HRAS           | 4NIF       |
| ABCA4          | 7LKZ       |
| ABCC6          | 6BZS       |
| ABCC6          | 6BZR       |
| AIPL1          | 6PX0       |
| CDH23          | 5TFM       |
| CDH23          | 5WJ8       |
| CDH23          | 5VVM       |
| RPGR           | 4QAM       |
| RPGRIP1        | 4QAM       |
| CTNNA1         | 4IGG       |
| CHM            | 1VG9       |
| CHM            | 1VG0       |

|        |      |
|--------|------|
| CNGA3  | 7RHS |
| CNGB1  | 7RH9 |
| CNGB3  | 7RHS |
| DFNB31 | 6KZ1 |
| DFNB31 | 6FDD |
| DFNB31 | 6FDE |
| ERCC6  | 7O03 |
| GNAT1  | 1TND |
| GNAT1  | 1TAD |
| GNAT1  | 1TAG |
| IDH3B  | 6KDF |
| MYO7A  | 5MV9 |
| MYO7A  | 3PVL |
| PCDH15 | 5ULY |
| PCDH15 | 6E8F |
| PCDH15 | 5T4M |
| PCDH15 | 4XHZ |
| PDE6A  | 6MZB |
| PDE6B  | 6MZB |
| PRPF3  | 6QW6 |
| PRPF31 | 2OZB |
| RBP3   | 1J7X |
| RBP3   | 4LUR |
| TIMP3  | 3CKI |
| USH1C  | 3K1R |
| USH1G  | 3K1R |
| BRCA1  | 1JM7 |
| BRCA1  | 1T29 |
| ERK2   | 4FMQ |
| ERK2   | 4NIF |
| RPE65  | 3FSN |
| RPE65  | 3KVC |
| RPE65  | 4F2Z |
| RHO    | 1GZM |
| RHO    | 3CAP |
| PRPH2  | 7ZW1 |



**Supplementary Table 1. Protein Data Bank accession numbers for well-studied human proteins and IRD genes.** Protein Data Bank<sup>4</sup> accession numbers listed here were used to access structural data for well-studied human proteins and IRD proteins.

## Supplementary References

- 1 Adzhubei, I., Jordan, D. M. & Sunyaev, S. R. Predicting functional effect of human missense mutations using PolyPhen-2. *Curr Protoc Hum Genet* **Chapter 7**, Unit7 20, doi:10.1002/0471142905.hg0720s76 (2013).
- 2 Frazer, J. *et al.* Disease variant prediction with deep generative models of evolutionary data. *Nature* **599**, 91-95, doi:10.1038/s41586-021-04043-8 (2021).
- 3 Cheng, J. *et al.* Accurate proteome-wide missense variant effect prediction with AlphaMissense. *Science* **381**, eadg7492, doi:10.1126/science.adg7492 (2023).
- 4 Berman, H. M. *et al.* The Protein Data Bank. *Nucleic Acids Res* **28**, 235-242, doi:10.1093/nar/28.1.235 (2000).
